# Supplementary material for: Milk Fat Globule Membrane Supplementation Promotes Neonatal Growth and Alleviates Inflammation in Low-Birth-Weight Mice Treated with Lipopolysaccharide
Source: PubMed Central journal article supplement (PMC6521396; doi:10.1155/2019/4876078), 2019-05-02
Supplement: 4876078.f1.pdf [file 4876078.f1.pdf]

**Supplementary Table S1. Mice primer sequences used in qRT-PCR**

| <b>Genes</b>   | <b>Forward</b>             | <b>Reverse</b>            |
|----------------|----------------------------|---------------------------|
| $\beta$ -Actin | TGGAATCCTGTGGCATCCATGAAAC  | TAAAACGCAGCTCAGTAACAGTCCG |
| IL-6           | ACCACGGCCTTCCCTACTT        | CACAACCTCTTTTCTCATTTCAC   |
| TNF- $\alpha$  | TGGGAGTAGACAAGGTACAACCC    | CATCTTCTCAAATTCGAGTGACAA  |
| IFN- $\gamma$  | GCGGCTGACTGAACTCAGATTGTAG  | AGTGCTGTCTGGCCTGCTGTTA    |
| IL-1 $\beta$   | CTCGCAGCAGCACATCAACAAG     | GGAAGGTCCACGGGAAAGACAC    |
| MUC2           | TGCTGACGAGTGGTTGGTGAATG    | GATGAGGTGGCAGACAGGAGACA   |
| MUC1           | AATGGCTCCTCGGTGCTACCTA     | TGACTTGGCACTGAAGGCTGAG    |
| ZO-1           | CGGAACTATGACCATCGCCTAC     | CTTCGGGATGTTGTCTGGAGTC    |
| Claudin-1      | AGCTGTGCATGGCCTCTTGT       | CCAATGTCAATGGCAACACCCT    |
| Occludin       | CAGCCTCGGTACAGCAGCAAT      | ATAGTGGTCAGGGTCCGTCCCTC   |
| TLR2           | AAGATGTCGTTCAAGGAGGTGCG    | ATCCTCTGAGATTTGACGCTTTG   |
| TLR4           | GGTGTGAAATTGAGACAATTGAAAAC | GTTTCCTGTCAGTACCAAGGTTGA  |
| SOD            | GAGACCTGGGCAATGTGACT       | GTTTACTGCGCAATCCCAAT      |
| CAT            | AAATGCTTCAGGGCCGCCTT       | GTAGGGACAGTTCACAGGTA      |
